# Supplementary material for: Green production of hydrogen-doped faceted cobalt microcrystals using water-assisted molten salt electro-reduction method
Source: Royal Society of Chemistry journal article supplement (doi:10.1039/d0ma00399a), 2020-01-01
Supplement: d0ma00399a1.pdf [file d0ma00399a1.pdf]

## Supplementary Information

### Green production of hydrogen-doped faceted cobalt microcrystals using water-assisted electro-reduction method

Dongwei Qiao, Kaiu Xie, Ali Reza Kamali\*

Energy and Environmental Materials Research Centre (E<sup>2</sup>MC), School of Metallurgy, Northeastern University, Shenyang 110819, China.

Email: ali@smm.neu.edu.cn (A.R.Kamali)

Table S1. The position and the intensity of reflection peaks observed in XRD pattern of the Co powder produced after 8 h of electrolysis.

| Position (2 $\theta$ ) | Height (cts) | d-spacing (Å) | Relative Intensity (%) | fcc-Co (JCPDS#001-1259) | hcp-Co (JCPDS#005-0727) |
|------------------------|--------------|---------------|------------------------|-------------------------|-------------------------|
| 41.7867                | 235.07       | 2.16173       | 12.07                  | -                       | 41.685°, (100), 20 cts  |
| 44.4614                | 1947.01      | 2.03770       | 100.00                 | 44.370°, (111), 100 cts | 44.763°, (002), 60 cts  |
| 47.6867                | 598.98       | 1.90714       | 30.76                  | -                       | 47.569°, (101), 100 cts |
| 51.7319                | 674.12       | 1.76712       | 34.62                  | 51.285°, (200), 8 cts   | -                       |
| 76.0527                | 700.91       | 1.25044       | 36.00                  | 75.374°, (220), 80 cts  | 75.941 (110), 80 cts    |

Table S2. A comparison between the various methods available for the reduction of cobalt oxides into metallic cobalt, based on the data available in the literature.

| Method                                        | Requirement                                                                                                                                                                                                                                                                                | Condition                                                              | Reference     |
|-----------------------------------------------|--------------------------------------------------------------------------------------------------------------------------------------------------------------------------------------------------------------------------------------------------------------------------------------------|------------------------------------------------------------------------|---------------|
| Direct reduction by reducing agents           | Hydrogen reduction of oxides. Pre-production of hydrogen followed by its storage/transportation                                                                                                                                                                                            | 400 -800 °C                                                            | [1-3]         |
|                                               | Ethanol (C <sub>2</sub> H <sub>5</sub> OH) reducing agent                                                                                                                                                                                                                                  | 800–950 °C                                                             | [4]           |
|                                               | Reduction of Co <sub>5</sub> O <sub>4</sub> ·7H <sub>2</sub> O by hydrazine hydrate (N <sub>2</sub> H <sub>4</sub> ·H <sub>2</sub> O) in the presence of chemicals such as cetyl trimethyl ammonium bromide (C <sub>16</sub> H <sub>33</sub> (CH <sub>3</sub> ) <sub>3</sub> NBr, and NaOH | Room temperature, ultrasound-assisted reduction                        | [5]           |
| Electrodeposition in aqueous electrolyte      | Electrolyte: acidic CoSO <sub>4</sub> ·7H <sub>2</sub> O-Na <sub>2</sub> SO <sub>4</sub> in the presence of tetra ethyl ammonium bromide                                                                                                                                                   | 60 °C, Energy consumption=2.4-3.0 kWh Kg <sup>-1</sup>                 | [6]           |
| Electrodeposition in non-aqueous electrolytes | Electrolyte: CoCl <sub>2</sub> in urea acetamide-LiBr                                                                                                                                                                                                                                      | 80 °C                                                                  | [7]           |
|                                               | Electrolyte: Co(TFSA) <sub>2</sub> in 1-butyl-1-methylpyrrolidinium bis(trifluoromethylsulfonyl)amide in the presence of coumarin and thiourea                                                                                                                                             | Cathodic potential= -2.2V vs silver QRE                                | [8]           |
| Molten salt electro-deoxidation               | Electrolyte: Molten Na <sub>2</sub> CO <sub>3</sub> -K <sub>2</sub> CO <sub>3</sub>                                                                                                                                                                                                        | 800 °C, Cell voltage> 1.7 V                                            | [9]           |
| Molten salt hydrogen electro-reduction        | Electrolyte: LiCl (water)                                                                                                                                                                                                                                                                  | 680 °C, cell voltage=1V, Energy consumption= 1.15 kWh Kg <sup>-1</sup> | Current study |

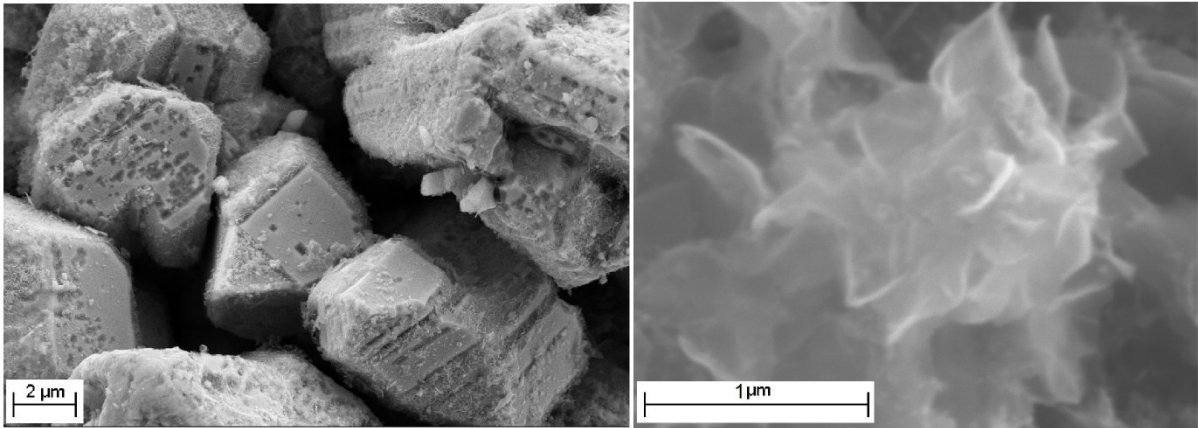

Fig. S1. SEM micrographs of the electrolytic product obtained by the cathodic polarisation of the oxide pellets at 680 °C under the humid Ar atmosphere at the cell voltage of 1V for 2h, at different magnifications.

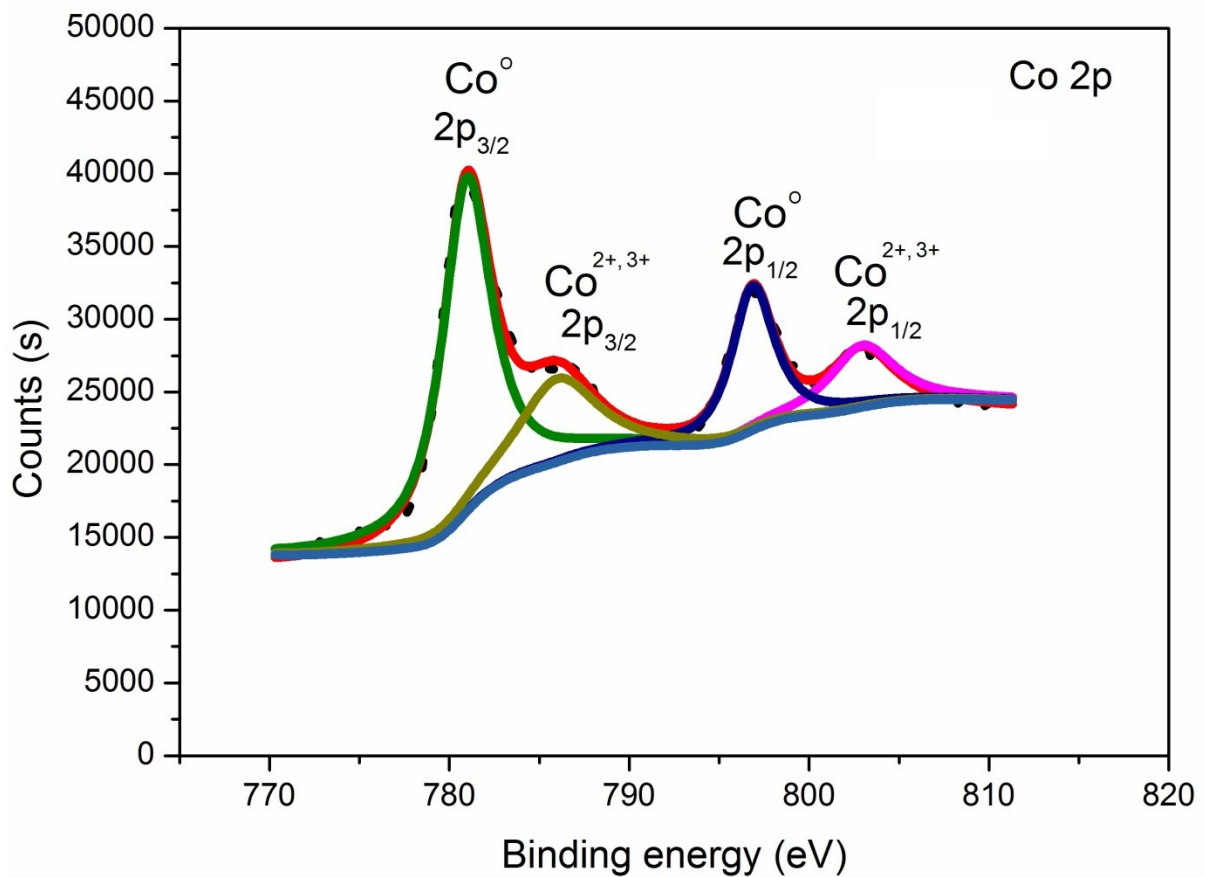

Fig. S2. Co(2p) XP spectra of electrolytic product obtained by the cathodic polarisation of the oxide pellets at 680 °C under the humid Ar atmosphere at the cell voltage of 1V for 6h.

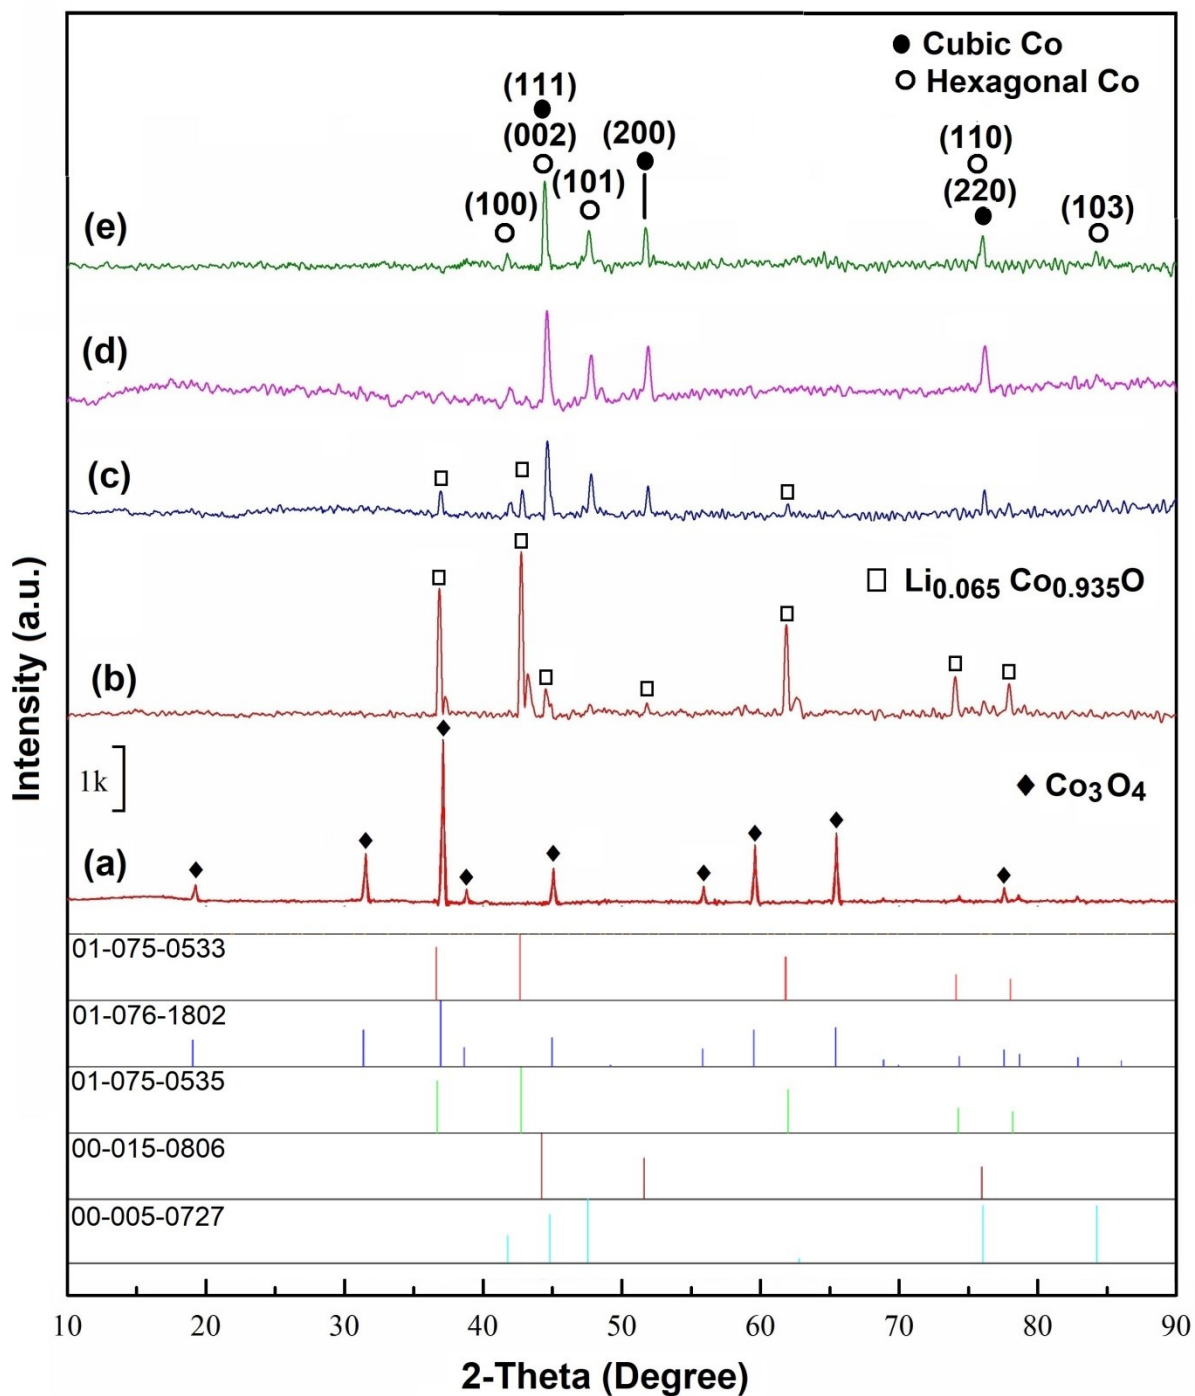

Fig. S3. The X-ray diffraction patterns of (a) the Co oxide after being pressed and sintered at 1300 °C, and (b-e) the electrolytic products obtained after various electrolysis duration under humid Ar at a low cell potential of 1V: (b) 2h, (c) 4h, (d) 6h and (e) 8h. The standard diffraction lines of JCPDS cards are also presented.

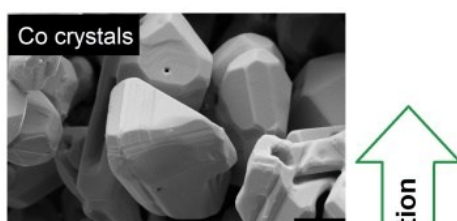

Fig. S4 The phase transitions from CoO initial particles to well-faceted cobalt microcrystals occurred during the water-assisted molten salt electro-reduction process.

## References

- [1] S. Liu, K. Xu, M. Wang, Preparation of Co powders for cemented carbides in China, *Int. J. Refract. Met. Hard Mater.*, 2006, **24**, 405-412.
- [2] W.S.W. Harun, M.S.I.N. Kamariah, N. Muhamad, S.A.C. Ghani, F. Ahmad, Z. Mohamed, A review of powder additive manufacturing processes for metallic biomaterials, *Powder Technol.*, 2018, **327**, 128-151.
- [3] J. Deng, S. Li, Y. Zhou, L. Liang, B. Zhao, X. Zhang, R. Zhang, Enhancing the microwave absorption properties of amorphous CoO nanosheet-coated Co (hexagonal and cubic phases) through interfacial polarizations, *J. Colloid Interface Sci.*, 2018, **509**, 406-413.
- [4] S. Cetinkaya, S. Eroglu, Synthesis of Cobalt Powder by Reduction of Cobalt Oxide with Ethanol, *JOM*, 2018, **70**, 2237-2242.
- [5] S. Wen, Y. Liu, X. Zhao, J. Cheng, H. Li, Facile synthesis of novel cobalt particles by reduction method and their microwave absorption properties, *Powder Technol.*, 2014, **264**, 128-13.
- [6] P. Patnai, S. K. Padhy, B. C. Tripathy, I. N. Bhattacharya, R. K. Paramguru, Electrodeposition of cobalt from aqueous sulphate solutions in the presence of tetra ethyl ammonium bromide, *Trans. Nonferrous Met. Soc. China*, 2015, **25**, 2047-2053.
- [7] M. Li, B. Gao, Z. Shi, X. Hu, S. Wang, L. Li, Z. Wang, J. Yu, Electrodeposition of cobalt from urea-acetamide-LiBr melt, *J. Solid State Electrochem.*, 2016, **20**, 247-254.
- [8] R. Fukui, Y. Katayama, T. Miura, The effect of organic additives in electrodeposition of Co from an amide-type ionic liquid, *Electrochim. Acta*, 2011, **56**, 1190-1196.
- [9] X. Cheng, D. Tang, D. Tang, H. Zhu, D. Wang. Cobalt Powder Production by Electro-Reduction of Co<sub>3</sub>O<sub>4</sub> Granules in Molten Carbonates Using an Inert Anode, *J. Electrochem. Soc.*, 2015, **162**, 68-72.
